# Supplementary material for: Scleral PERK and ATF6 as targets of myopic axial elongation of mouse eyes
Source: PubMed Central journal article supplement (PMC9550863; doi:10.1038/s41467-022-33605-1), 2022-10-10
Supplement: 41467_2022_33605_MOESM1_ESM.pdf [file 41467_2022_33605_MOESM1_ESM.pdf]

**Supplementary Information for:**

Scleral PERK and ATF6 as targets of myopic axial elongation of mouse eyes

Shin-ichi Ikeda<sup>1,2</sup>, Toshihide Kurihara<sup>1,2\*</sup>, Xiaoyan Jiang<sup>1,2</sup>, Yukihiro Miwa<sup>1,2</sup>, Deokho Lee<sup>1,2</sup>, Naho Serizawa<sup>1,2</sup>, Heonuk Jeong<sup>1,2</sup>, Kiwako Mori<sup>1,2</sup>, Yusaku Katada<sup>1,2</sup>, Hiromitsu Kunimi<sup>1,2</sup>, Nobuhiro Ozawa<sup>1,2</sup>, Chiho Shoda<sup>1,2</sup>, Mari Ibuki<sup>1,2</sup>, Kazuno Negishi<sup>2</sup>, Hidemasa Torii<sup>1,2</sup>, Kazuo Tsubota<sup>2,3\*</sup>

<sup>1</sup> Laboratory of Photobiology, Keio University School of Medicine, 35 Shinanomachi, Shinjuku-ku, Tokyo 160-8582, Japan

<sup>2</sup> Department of Ophthalmology, Keio University School of Medicine, 35 Shinanomachi, Shinjuku-ku, Tokyo 160-8582, Japan

<sup>3</sup> Tsubota Laboratory, Inc., 34 Shinanomachi, Shinjuku-ku, Tokyo 160-0016 Japan

\*E-mail: kurihara@z8.keio.jp / tsubota@tsubota-lab.com

**Supplemental Figure 1-10**

**Supplemental Table 1-8**

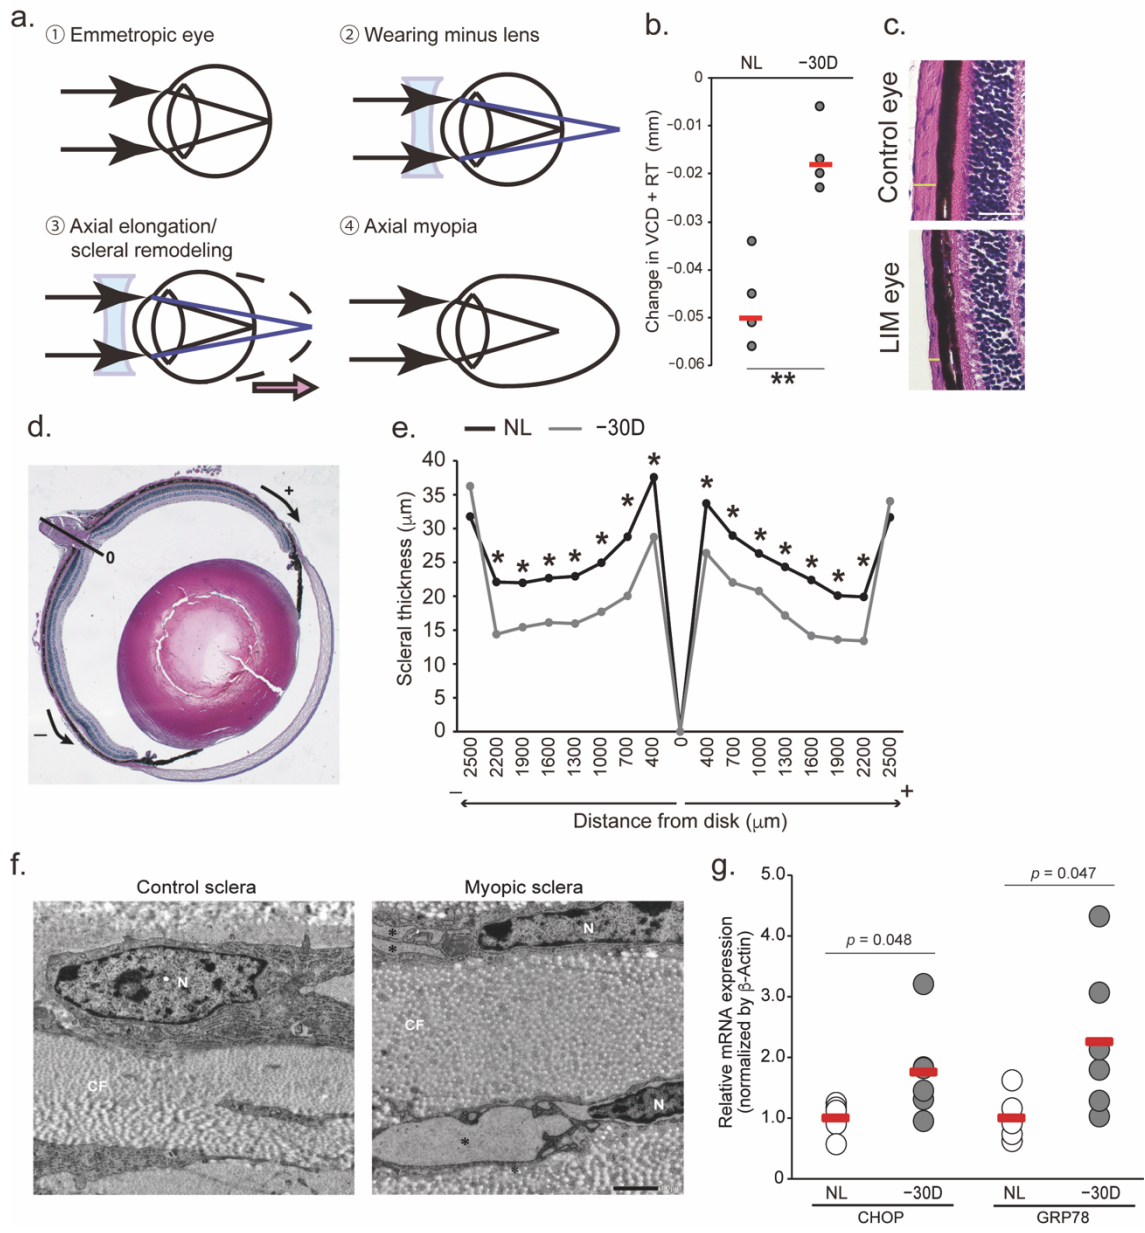

### **Supplemental Figure 1 | Lens-induced myopia in mice and chicks.**

**(a)** Schematic structure of lens-induced myopia (LIM). **(b)** Changes in vitreous chamber depth (VCD) + retinal thickness (RT) during 3-week lens-induced myopia (LIM) in C57BL6J mice (n = 4). NL: No Lens control, -30D: minus 30 D lens-wearing eye. \*\* p = 0.002; Student's two-tailed t-test. **(c)** Haematoxylin and eosin staining of control and LIM eyes. Yellow bars indicate scleral thickness (n = 5 per group); scale bar, 50  $\mu\text{m}$ . **(d)** Measurement of scleral thickness. The position of the optic disk is represented by '0', and superior (+) and inferior (-) distances from disk were measured. At 400, 700, 1000, 1300, 1600, 1900, 2200 and 2500  $\mu\text{m}$ , scleral thickness was measured. **(e)** Scleral thickness of control (black line) and LIM (grey line) eyes measured in HE-stained sections (n = 5 per group); \* p < 0.05; Student's two-tailed t-test (The exact p-values are, from left to right: 0.019, 0.002, 0.015, 0.001, 0.003, 0.004, 0.004, 0.006, 0.011, 0.015, 0.00063, 0.00045, 0.0003, 0.003, 0.026). **(f)** TEM images of control and LIM sclerae of White Leghorn chicks (n = 3 per group). Scale bars, 2  $\mu\text{m}$ . **(g)** mRNA expression levels of CHOP and GRP78 in control and LIM sclerae of White Leghorn chicks (n = 6 per group). NL group was assigned a value of 1.0. The p values were determined by Student's two-tailed t-test. Source data are provided as a Source Data file.

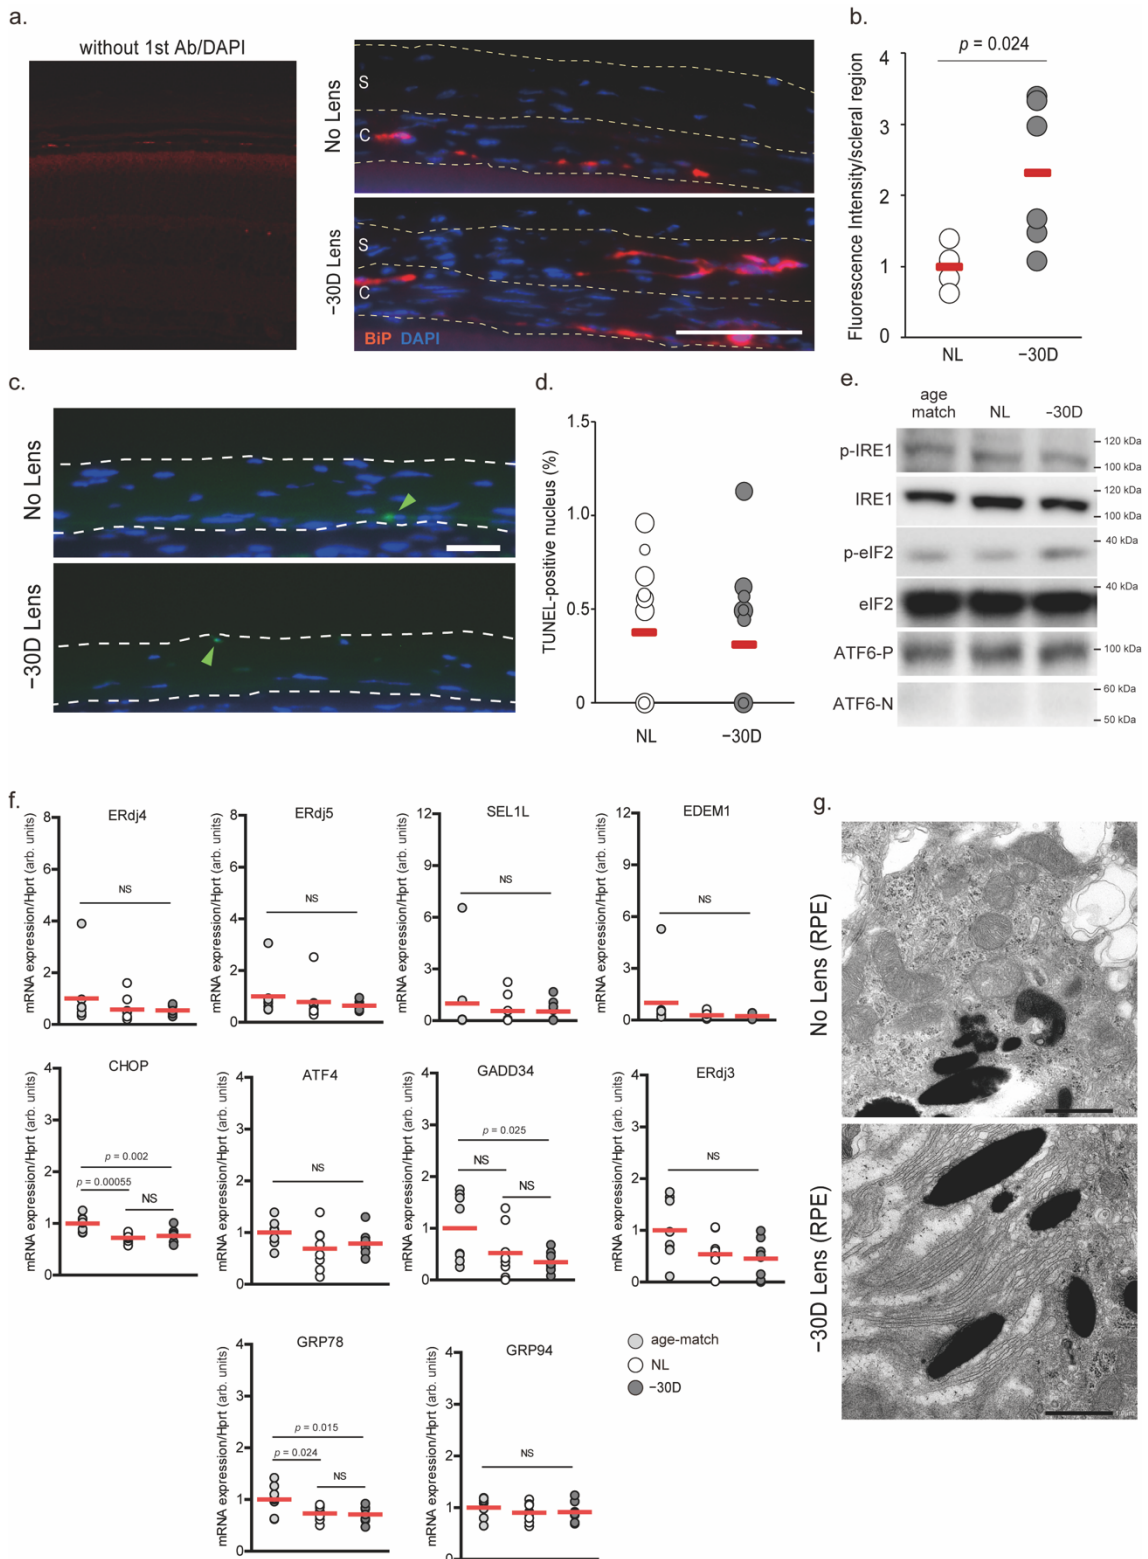

**Supplemental Figure 2 | Ophthalmological and cellular changes after LIM in the sclera and the retina.**

**(a)** Immunohistochemical images stained for Bip (red) and DAPI (nucleus, blue) of no lens (middle panel) and minus 30 D lens-wearing (right panel) sclerae in C57BL6J mice. The area between the yellow dot lines is the sclera (S), and the area between the yellow and green dot lines is the choroid (C). The images were acquired from posterior region (in the area around 400-1000  $\mu\text{m}$  from the disc). The left panel showed the image of no-primary antibody control. Showing representative images in four biologically independent samples; scale bar, 20  $\mu\text{m}$ . **(b)** Bar graph showing the results of the quantification of the fluorescence intensity in Supplemental Fig 2a ( $n = 5$  in NL group,  $n = 6$  in -30 D group). NL group was assigned a value of 1.0. The p value was determined by Student's two-tailed t-test. **(c)** TUNEL images (green: TUNEL, blue: DAPI) of control and LIM sclerae in C57BL6J mice. The bottom part facing towards the choroid. The area between the yellow dot lines is the sclera. The images were acquired from posterior region (in the area around 400-1000  $\mu\text{m}$  from the disc). Upper panel: no lens control, lower panel: LIM. Arrowheads indicate TUNEL-positive nuclei. Showing representative images in four biologically independent samples.; scale bar, 100  $\mu\text{m}$ . **(d)** Bar graph showing the ratio of TUNEL-positive nuclei to DAPI-positive nuclei in sclera. The p value was determined by Student's two-tailed t-test. Three images were acquired from each of the four slides (12 images in total) for quantitative analysis. **(e)** IRE1, eIF2 and ATF6 did not activated by LIM in retina determined by Western blotting. Showing representative blots in four biologically independent samples. **(f)** UPR target gene expression level determined by quantitative PCR in age matched control (right grey column), No-Lens control (white column) and LIM (grey column) retina for 3-week LIM

(n = 8). Age-match group was assigned a value of 1.0. The p values were determined by ANOVA with Bonferroni's Multiple Comparison Test. **(g)** TEM images of retinal pigment epithelium from control and myopia-induced eyes. (n = 3 per group). Scale bars, 1  $\mu$ m. Source data are provided as a Source Data file.

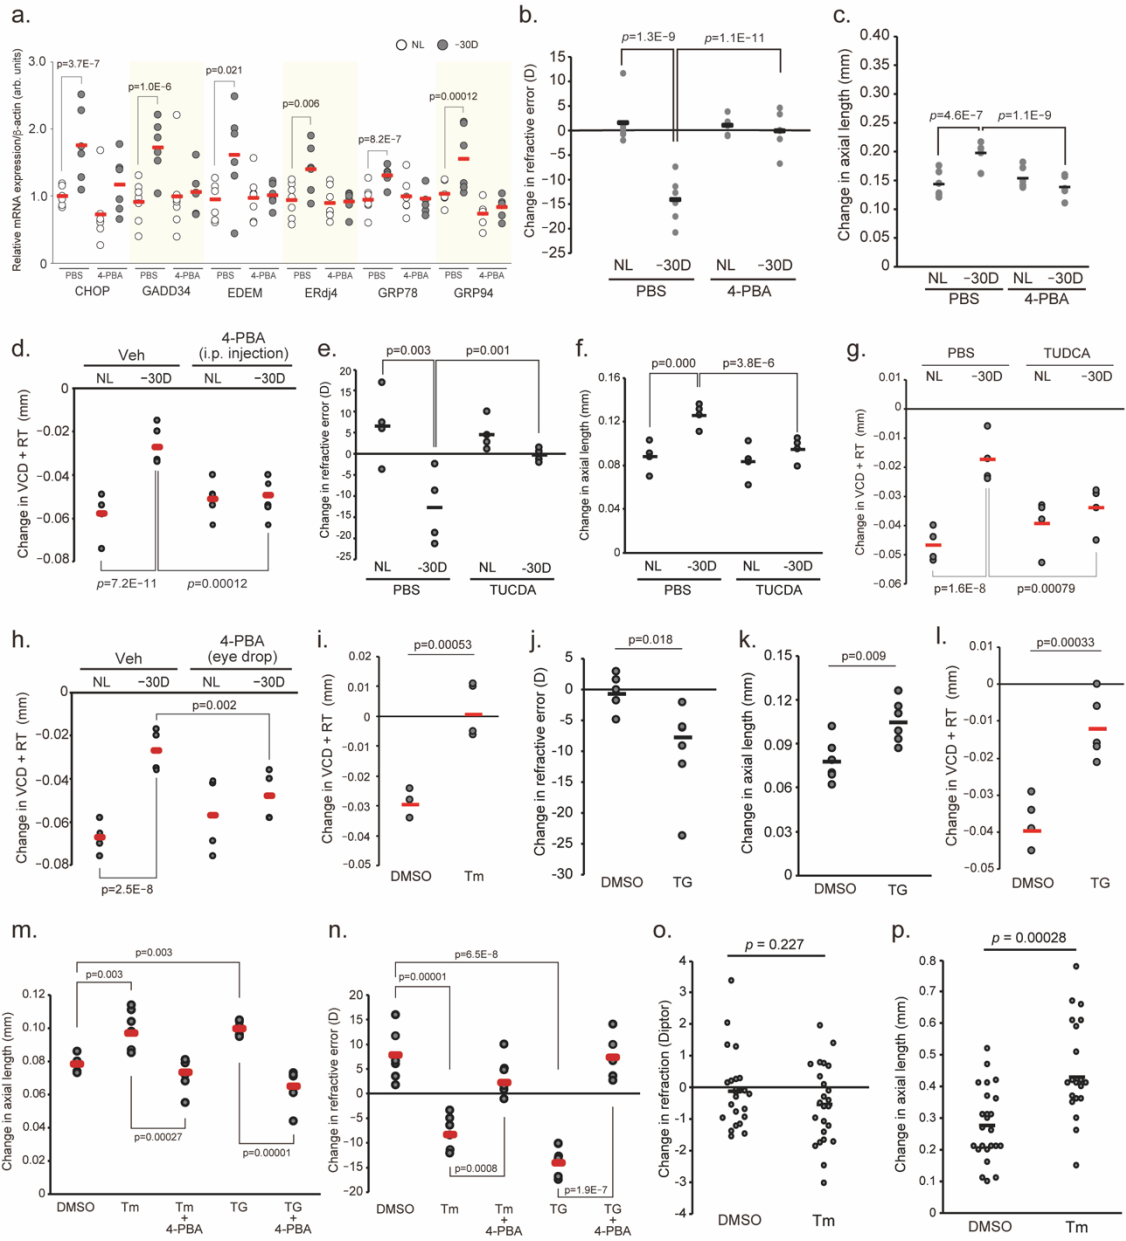

**Supplemental Figure 3 | Intervention of scleral ER stress affects eyeball size and refraction in mice and chicks.**

**(a)** Intraperitoneal (i.p.) injection of 4-phenylbutyric acid (4-PBA; 200 mg/kg/day) suppresses 3-week-LIM-induced increase in UPR gene expression determined by quantitative PCR in control (No Lens, white column) and LIM (-30 D, grey column) sclerae (n = 6 per group). The p values were determined by two-tailed Generalized Estimating Equations. 0.00012**(b)** LIM-induced myopic shift in refraction was inhibited by 4-PBA administration for 1 week (n = 6 per group). The p values were determined by Generalized Estimating Equations. **(c)** LIM-induced axial elongation was inhibited by 4-PBA administration for 1 week (n = 6 per group). The p values were determined by Generalized Estimating Equations. **(d)** LIM-induced attenuation of vitreous chamber depth (VCD) + retinal thickness (RT) shortening suppressed by 4-PBA administration for 3 week (n = 6 per group). The p values were determined by Generalized Estimating Equations. **(e)** LIM-induced myopic shift in refraction was inhibited by TUDCA administration for 3 weeks (n = 4). The p values were determined by two-tailed Generalized Estimating Equations. **(f)** LIM-induced axial elongation was inhibited by TUDCA administration for 3 weeks (n = 4 per group). The p values were determined by two-tailed Generalized Estimating Equations. **(g)** LIM-induced attenuation of VCD + RT shortening suppressed by TUDCA administration for 3 week (n = 4 per group). The p values were determined by two-tailed Generalized Estimating Equations. **(h)** LIM-induced attenuation of VCD + RT shortening suppressed by 2% 4-PBA instillation for 3 week (n = 6 per group). The p values were determined by two-tailed Generalized Estimating Equations. **(i)** Single tunicamycin (Tm, 50 µg/mL) instillation suppressed VCD + RT shortening during eye growth (n = 5). The p values were determined by



Student's two-tailed t-test. **(j)** Single thapsigargin (TG: 10  $\mu$ M) instillation induced refractive error (n = 6). The p values were determined by Student's two-tailed t-test. **(k)** Single TG (10  $\mu$ M) instillation induced pathological axial elongation (n = 6 per group). The p values were determined by Student's two-tailed t-test. **(l)** Single TG (10  $\mu$ M) instillation suppressed VCD + RT shortening during eye growth (n = 5). The p values were determined by Student's two-tailed t-test. **(m)** 4-PBA suppressed single Tm or TG instillation-induced axial elongation. The p values were determined by one-way ANOVA with Tukey HSD. **(n)** 4-PBA suppressed single Tm or TG instillation-induced refractive error. The p values were determined by one-way ANOVA with Tukey HSD. **(o)** Effect of single tunicamycin (Tm; 50  $\mu$ g/mL) instillation on refraction in white Leghorn chicks. Both groups included 12 chicks (24 eyes). The p value was determined by Student's two-tailed t-test. **(p)** Effect of single Tm (50  $\mu$ g/mL) instillation on axial elongation for 1 week in white Leghorn chicks. Both groups included 12 chicks (24 eyes). The p values were determined by Student's two-tailed t-test. Source data are provided as a Source Data file.

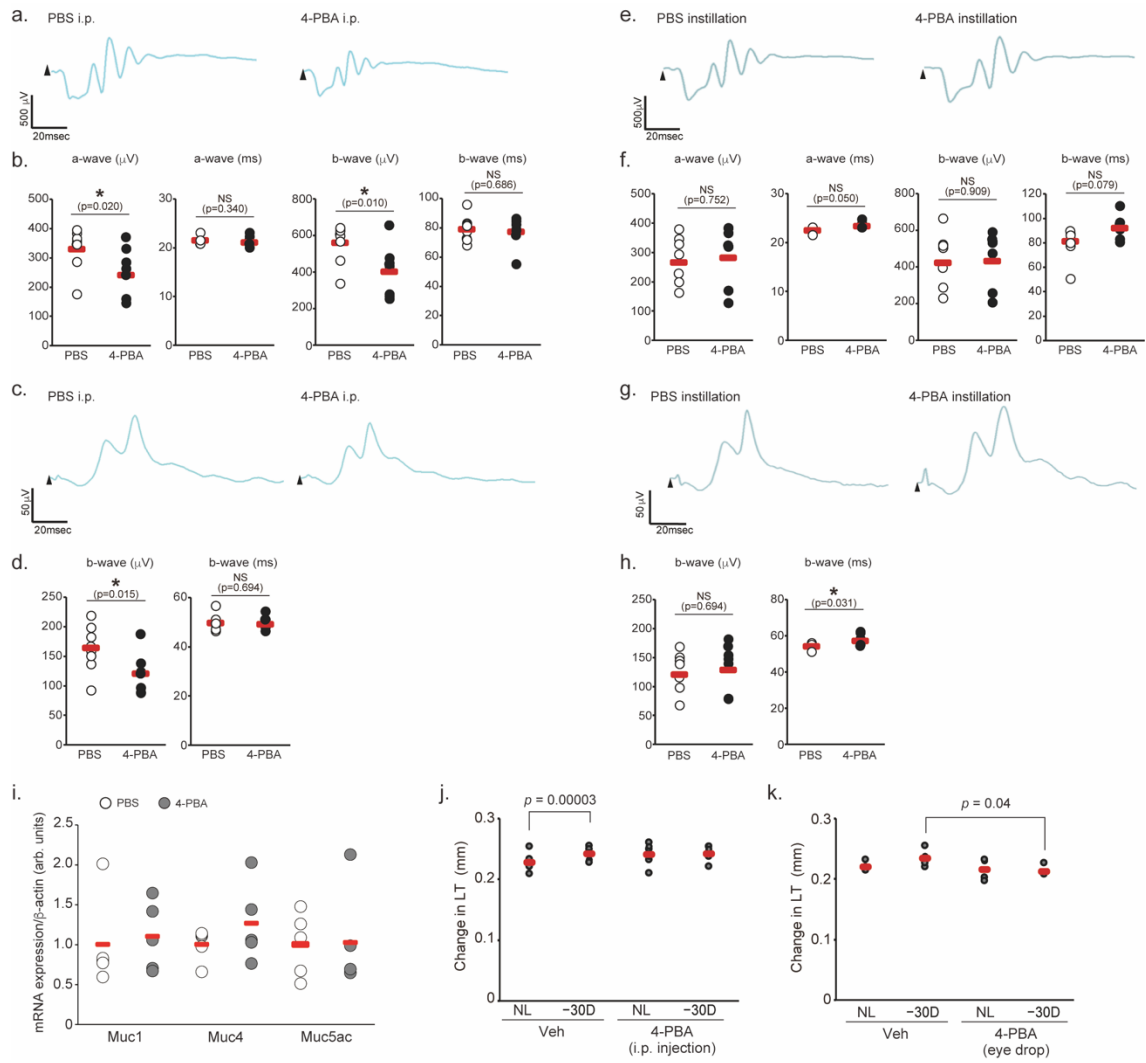

**Supplemental Figure 4 | Side effect of 4-PBA administration in another component of the eye.**

**(a)** Representative ERG waveforms ( $50 \text{ cd} \cdot \text{s}/\text{m}^2$ ) of scotopic condition in PBS or 4-PBA i. p. injected mice. **(b)** Averaged amplitudes (left panels) and implicit time (right panels) of a-wave and b-wave in scotopic condition of PBS or 4-PBA i. p. injected mice ( $n = 9$ , respectively). The  $p$  values were determined by Student's two-tailed  $t$ -test. **(c)** Representative ERG waveforms ( $20 \text{ cd} \cdot \text{s}/\text{m}^2$ ) of photopic condition in PBS or 4-PBA i. p. injected mice. **(d)** Averaged amplitudes (left panels) and implicit time (right panels) of b-wave in photopic condition of PBS or 4-PBA i. p. injected mice ( $n = 9$ , respectively). The  $p$  values were determined by Student's two-tailed  $t$ -test. **(e)** Representative ERG waveforms of scotopic condition in PBS or 4-PBA instilled mice. **(f)** Averaged amplitudes (left panels) and implicit time (right panels) of a-wave and b-wave in scotopic condition of PBS or 4-PBA instilled mice ( $n = 8$ , respectively). The  $p$  values were determined by Student's two-tailed  $t$ -test. **(g)** Representative ERG waveforms of photopic condition in PBS or 4-PBA instilled mice. **(h)** Averaged amplitudes (left panels) and implicit time (right panels) of b-wave in photopic condition of PBS or 4-PBA instilled mice ( $n = 7$ , respectively). The  $p$  values were determined by Student's two-tailed  $t$ -test. **(i)** Gene expression level of Mucin 1, 4 and 5ac in conjunctiva after 3 weeks of ocular administration of PBS (white column) and 4-PBA (gray column). Student's two-tailed  $t$ -test showed no significant differences. **(j)** Changes in lens thickness (LT) for 3 weeks LIM with PBS or 4-PBA i. p. injection. The  $p$  value was determined by two-tailed Generalized Estimating Equations. **(k)** Changes in lens thickness (LT) for 3 weeks LIM with PBS or 4-PBA instillation. The  $p$  value was determined by two-tailed Generalized Estimating Equations. Source data are provided as a Source Data file.

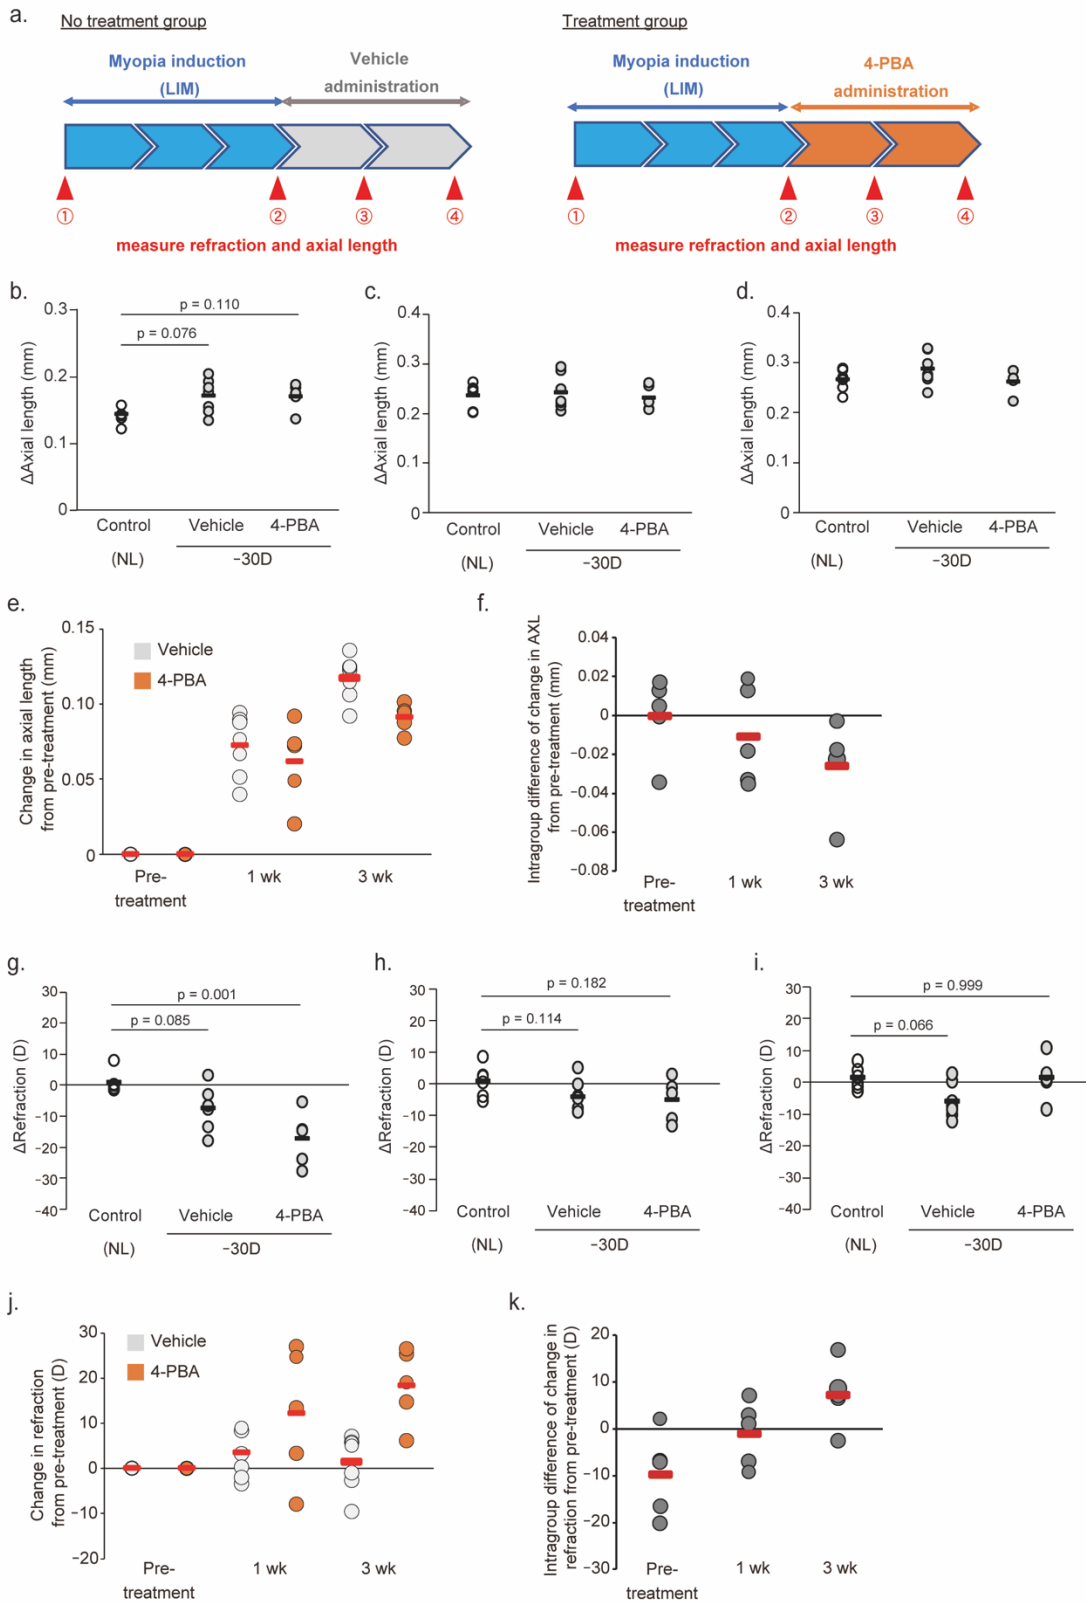

**Supplemental Figure 5 | 4-PBA instillation is effective for myopia prevention and treatment.**

**(a)** Experimental design of the experiments. After 3 weeks of LIM (without any treatment such as 4-PBA), the minus lenses and frames were removed, and PBS or 4-PBA eye drops were administered for 3 weeks. **(b)** Axial elongation during the lens-induced myopia (LIM) period ((2) - (1)) in the control (n = 6), vehicle (n = 7), and 4-PBA (n = 5)-instilled groups. The p values were determined by one-way ANOVA with Tukey HSD. **(c, d)** Axial elongation for **(c)** 1-week treatment ((3) - (1)) and **(d)** 3-week treatment ((4) - (1)) in the control (n = 6), vehicle (n = 7), and 4-PBA (n = 5)-instilled groups. **(e)** Axial elongation from pretreatment ((2)) to 1-week ((3) - (2)) or 3-week ((4) - (2)) treatment in the vehicle (n = 7) and 4-PBA (n = 5)-instilled groups. **(f)** Differences between axial length of each 4-PBA-treated mouse and the average axial length of the vehicle-treated group (n = 5). **(g)** Refractive error during the LIM period ((2) - (1)) in the control (n = 6), vehicle (n = 7), and 4-PBA (n = 5)-instilled groups. The p values were determined by one-way ANOVA with Tukey HSD. **(h, i)** Refractive error for **(h)** 1-week treatment ((3) - (1)) and **(i)** 3-week treatment ((4) - (1)) in the control (n = 6), vehicle (n = 7), and 4-PBA (n = 5)-instilled groups. The p values were determined by one-way ANOVA with Tukey HSD. **(j)** Refractive error from pretreatment ((2)) to 1-week ((3) - (2)) or 3-week ((4) - (2)) treatment in the vehicle (n = 7) and 4-PBA (n = 5)-instilled groups. **(k)** Differences between refraction of each 4-PBA treated mouse and the average refraction of the vehicle-treated group (n = 5). Source data are provided as a Source Data file.

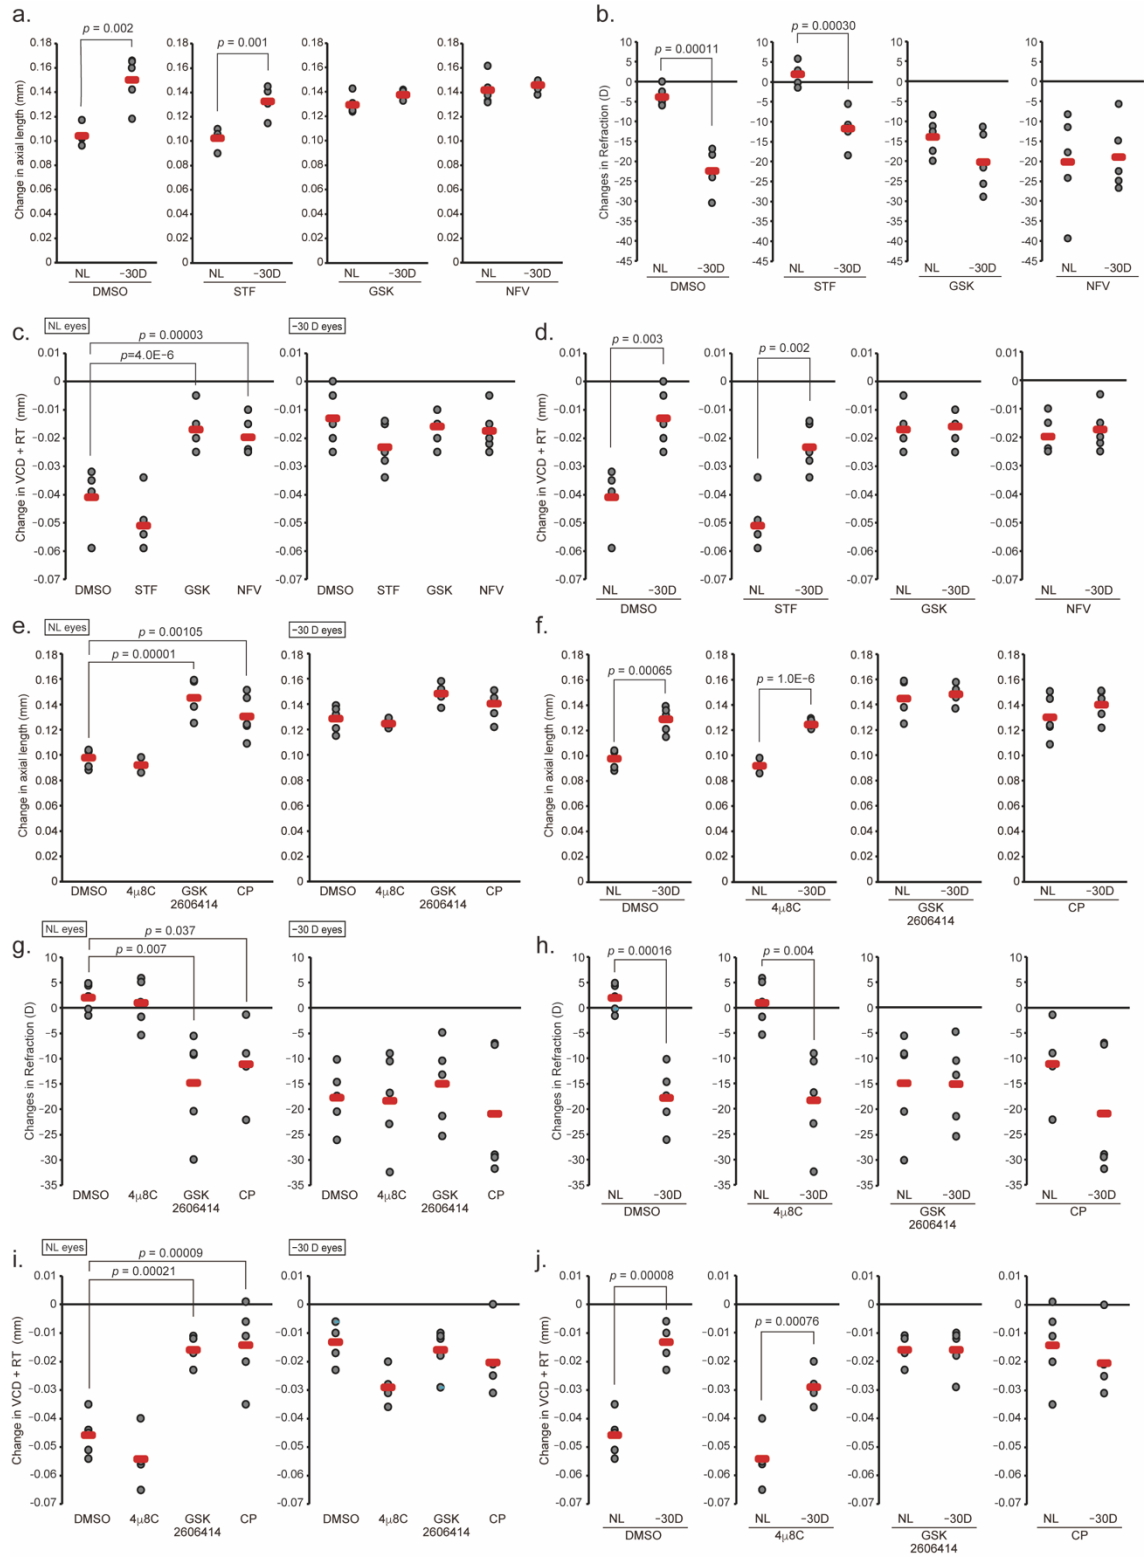

**Supplemental Figure 6 | Effect of single UPR inhibitor instillation on myopia development.**

**(a)** Comparison of axial elongation between non-lens-wearing eyes (NL) and minus-lens-wearing eyes (-30D) in DMSO (as a control), STF080310 (STF; 100  $\mu$ M), GSK2656157 (GSK; 100  $\mu$ M), and nelfinavir (NFV; 100  $\mu$ M)-administrated mouse. The p values were determined by Student's two-tailed t-test. **(b)** Comparison of refraction between NL and -30D eyes in DMSO, STF GSK and NFV-administrated mouse. The p values were determined by Student's two-tailed t-test. **(c)** Effects of STF, GSK, and NFV eye drops on VCD+RT in NL and -30 D eyes (n = 5 per group). The p values were determined by two-tailed Generalized Estimating Equations. **(d)** Comparison of VCD+RT between NL and -30D eyes in DMSO, STF GSK and NFV-administrated mouse. The p values were determined by Student's two-tailed t-test. **(e)** Effects of 4 $\mu$ 8C, GSK2606414, and Ceapin A-7 instillation (100  $\mu$ M, respectively) eye drops on axial elongation in NL and -30 D eyes (n = 5 per group). The p values were determined by one-way ANOVA with Tukey HSD. **(f)** Comparison of axial elongation between NL and -30D eyes in DMSO, 4 $\mu$ 8C, GSK2606414, and Ceapin A-7-administrated mouse. The p values were determined by Student's two-tailed t-test. **(g)** Effects of 4 $\mu$ 8C, GSK2606414, and Ceapin A-7 instillation eye drops on refractive error in NL and -30 D eyes (n = 5 per group). The p values were determined by one-way ANOVA with Tukey HSD. **(h)** Comparison of refractive error between NL and -30D eyes in DMSO, 4 $\mu$ 8C, GSK2606414, and Ceapin A-7-administrated mouse. The p values were determined by Student's two-tailed t-test. **(i)** Effects of 4 $\mu$ 8C, GSK2606414, and Ceapin A-7 instillation eye drops on VCD+RT in NL and -30 D eyes (n = 5 per group). The p values were determined by one-way ANOVA with Tukey HSD. **(j)** Comparison of VCD+RT between NL and -30D eyes in DMSO,

4 $\mu$ 8C, GSK2606414, and Ceapin A-7-administrated mouse. The p values were determined by Student's two-tailed t-test. Source data are provided as a Source Data file.



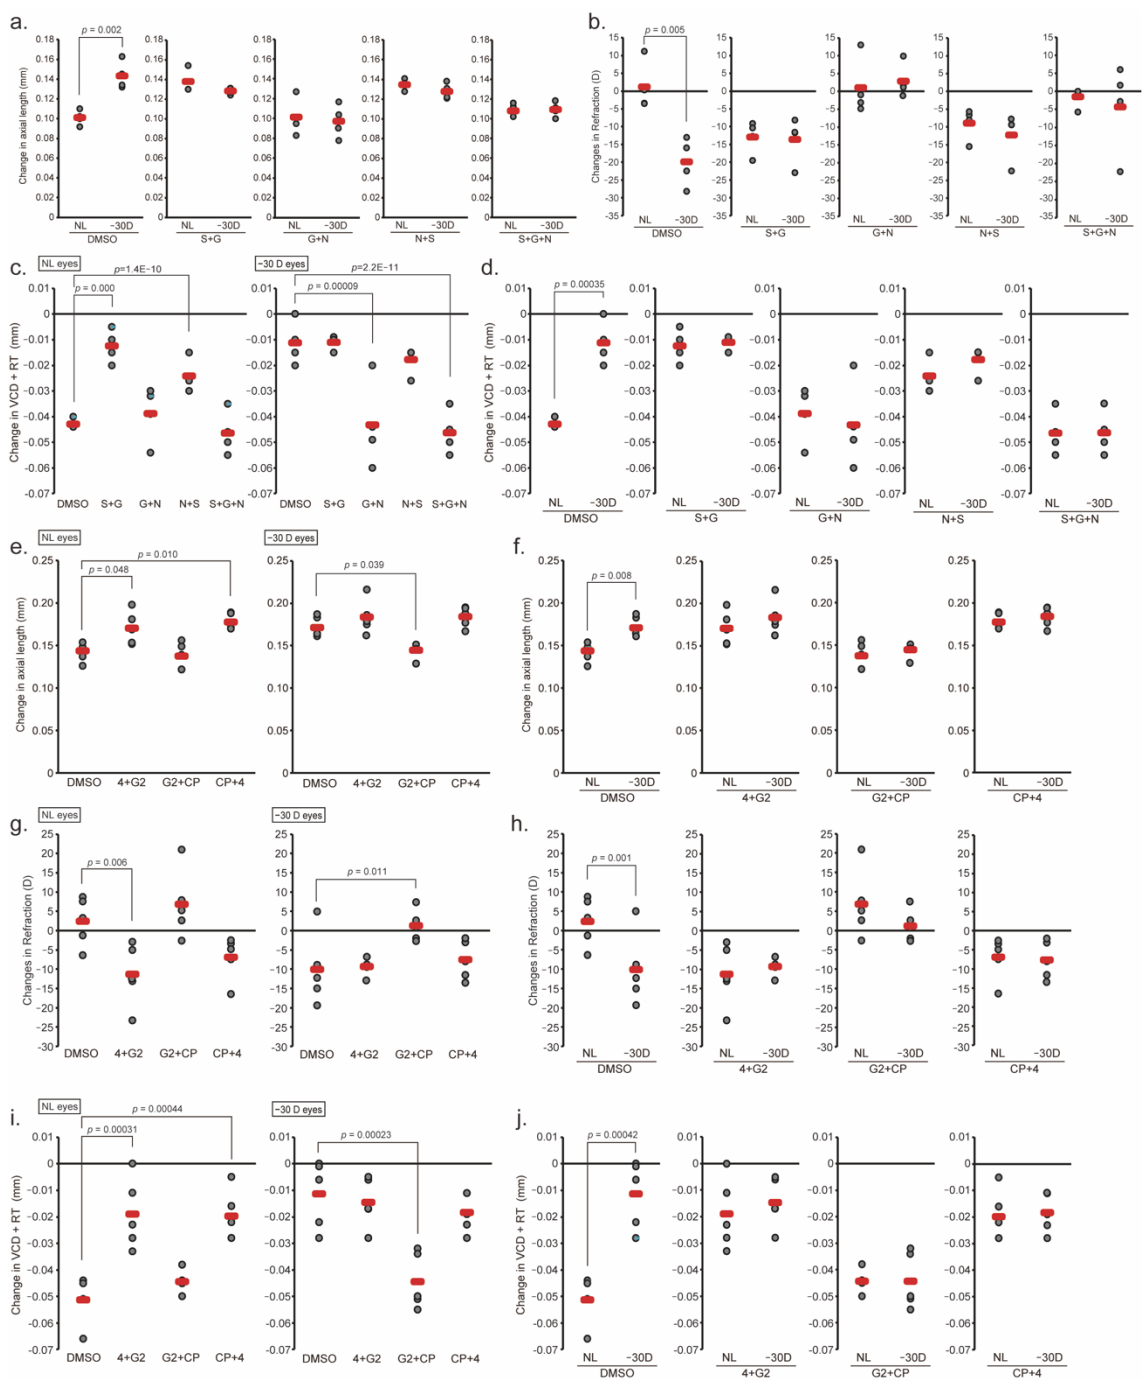

**Supplemental Figure 7 | Effect of combined UPR inhibitor instillation on myopia development.**

**(a)** Comparison of axial elongation between non-lens-wearing eyes (NL) and minus-lens-wearing eyes (-30D) in DMSO (as a control), STF080310 with GSK2656157 (S+G; 100  $\mu$ M, respectively), GSK2656157 with nelfinavir (G+N; 100  $\mu$ M, respectively), nelfinavir with STF080310 (N+S; 100  $\mu$ M, respectively) and all inhibitors (S+G+N)-administrated mouse. The p values were determined by Student's two-tailed t-test. **(b)** Comparison of refraction between NL and -30D eyes in DMSO, S+G, G+N, N+S and S+G+N-administrated mouse. The p values were determined by Student's two-tailed t-test. **(c)** Effects of combined STF, GSK, and NFV eye drops on VCD+RT in NL and -30 D eyes (n = 5 per group). The p values were determined by two-tailed Generalized Estimating Equations. **(d)** Comparison of VCD+RT between NL and -30D eyes in DMSO, S+G, G+N, N+S and S+G+N-administrated mouse. The p values were determined by Student's two-tailed t-test. **(e)** Effects of combined 4 $\mu$ 8C, GSK2606414, and Ceapin A-7 instillation (4 $\mu$ 8C with GSK2606414: 4+G2, GSK2606414 with Ceapin A-7: G2+CP, Ceapin A-7 with 4 $\mu$ 8C: CP+4) eye drops on axial elongation in NL and -30 D eyes (n = 5 per group). The p values were determined by one-way ANOVA with Tukey HSD. **(f)** Comparison of axial elongation between NL and -30D eyes in DMSO, 4+G2, G2+CP and CP+4-administrated mouse. The p values were determined by Student's two-tailed t-test. **(g)** Effects of 4+G2, G2+CP and CP+4 instillation eye drops on refractive error in NL and -30 D eyes (n = 5 per group). The p values were determined by one-way ANOVA with Tukey HSD. **(h)** Comparison of refractive error between NL and -30D eyes in DMSO, 4+G2, G2+CP and CP+4-administrated mouse. The p values were determined by Student's two-tailed t-test. **(i)** Effects of 4+G2, G2+CP and CP+4 instillation eye drops

on VCD+RT in NL and -30 D eyes (n = 5 per group). The p values were determined by one-way ANOVA with Tukey HSD. **(j)** Comparison of VCD+RT between NL and -30D eyes in DMSO, 4+G2, G2+CP and CP+4-administrated mouse. The p values were determined by Student's two-tailed t-test. Source data are provided as a Source Data file.

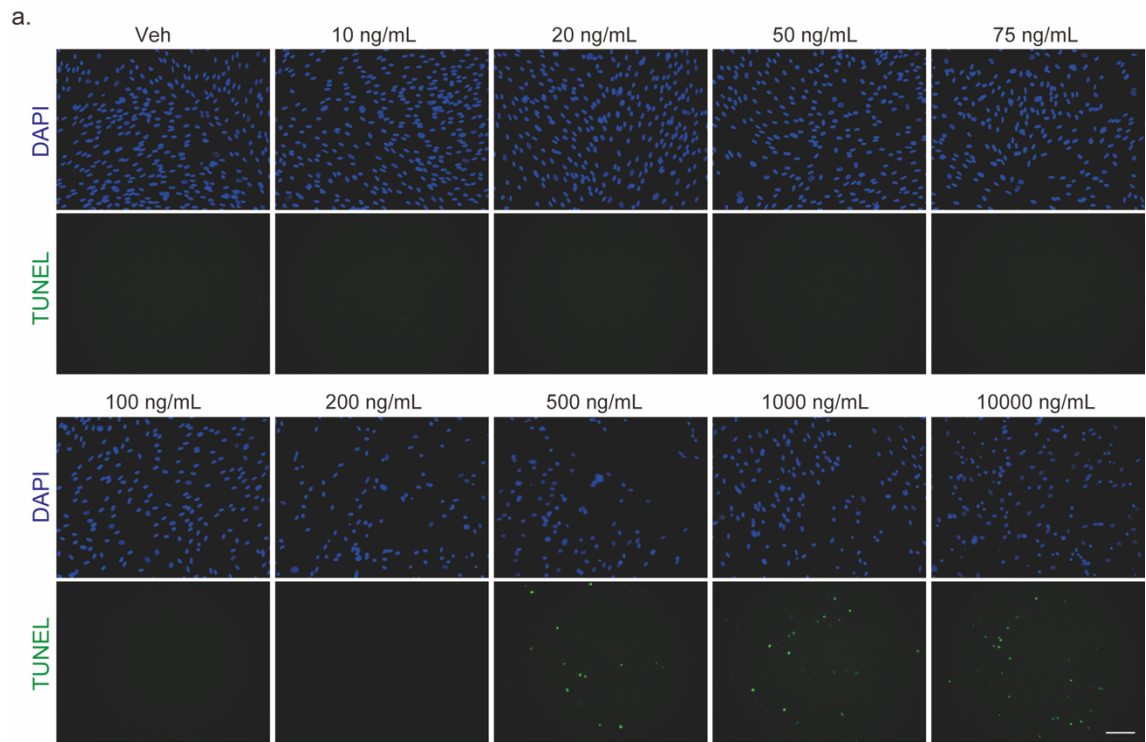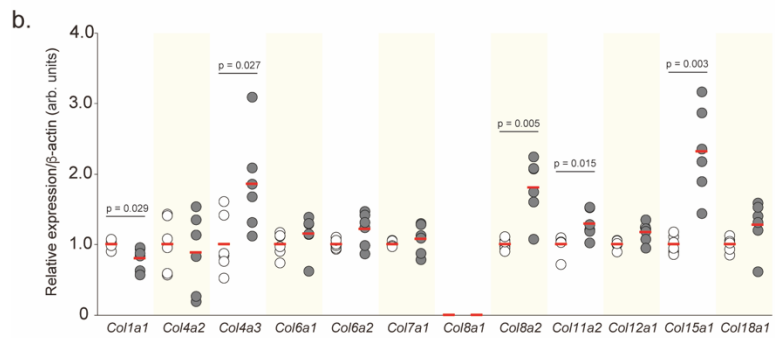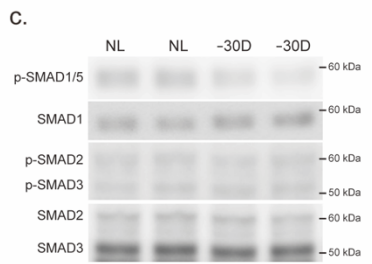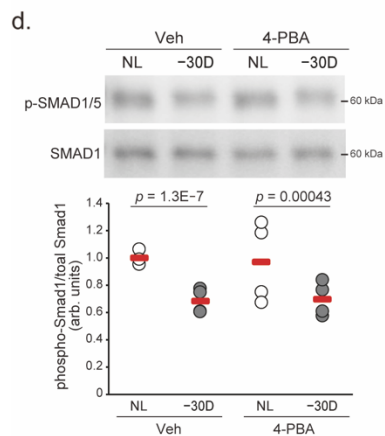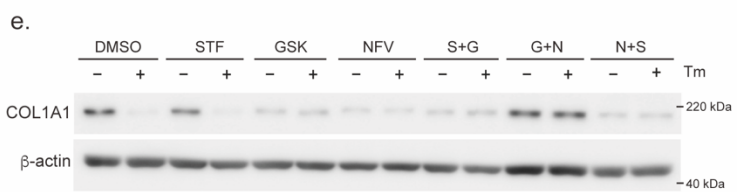

**Supplemental Figure 8 | Tunicamycin-induced dysregulation of collagen gene expression and its possible mechanism**

**(a)** Effect of different concentrations of tunicamycin (Tm; 24 h) on cell death in human scleral fibroblasts. Upper panels: DAPI staining (blue), lower panel: TUNEL staining (green). Representative images of three biologically independent samples. **(b)** Effect of Tm (200 ng/mL) treatment on the expression of 12 LIM-sensitive collagen genes in human scleral fibroblasts (n = 6 per group). The p values were determined by Student's two-tailed t-test. **(c)** Immunoblots showing effect of minus lens-wearing on phosphorylation levels of SMAD1/5, SMAD2 and SMAD3. Representative blots from three independent experiments are shown. **(d)** Effect of LIM and 4-PBA instillation on phosphorylation of SMAD1. The p values were determined by two-tailed Generalized Estimating Equations. **(e)** Effect of IRE1, PERK and ATF6 inhibitors on the degradation of COL1A1 induced by tunicamycin (Tm, 200 ng/ml for 6 hours). Source data are provided as a Source Data file.

PBS-administrated group

4-Phenylbutyric Acid

Retina

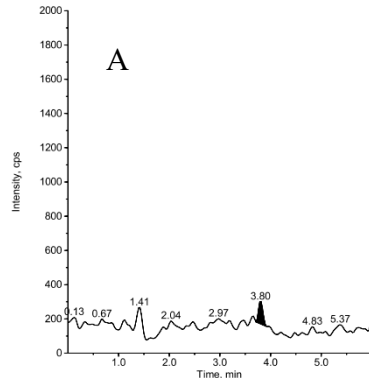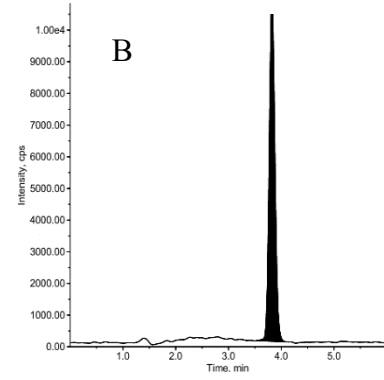

Choroid

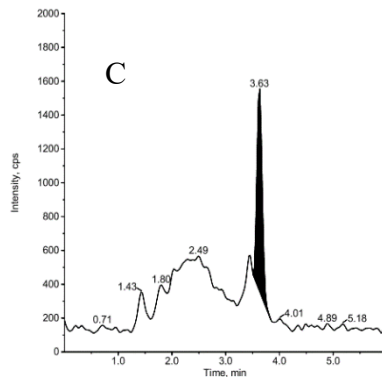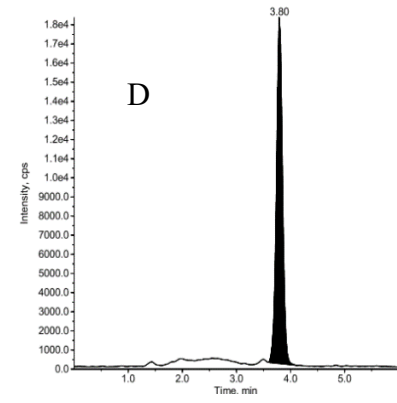

Sclera

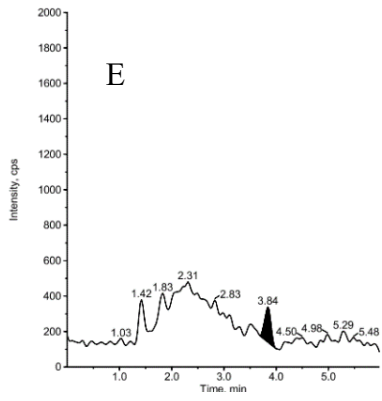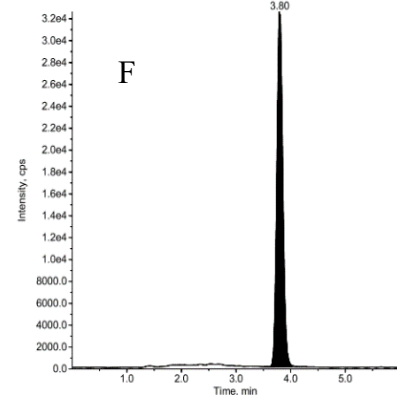

Standard

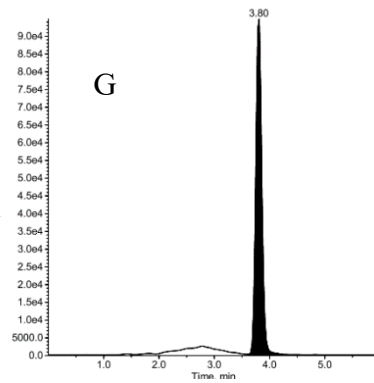

**Supplemental Figure 9 | Representative chromatogram of 4-Phenylbutyric Acid (4-PBA) in mouse ocular tissues after 4-PBA or PBS treatment**

A to F are chromatograms corresponding to the results in Table 4. As an example, the retention time of the peak detected with the standard reagent (2,000 ng/g) of 4-PBA is shown in G. Concentrations of 4-Phenylbutyric Acid were determined by the internal standard method. 0.57 mg of 4-Phenylbutyric Acid-d<sub>11</sub> was weighed and dissolved in 5.7 mL of methanol to prepare an internal standard stock solution of 100 µg/mL. The prepared internal standard stock solution was diluted with methanol to prepare a 100 ng/mL internal standard working solution.

PBS-administrated group

4-PBA administrated group

Retina

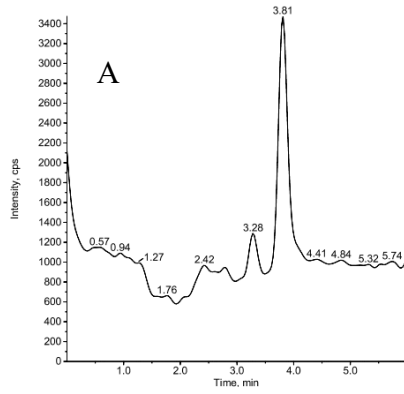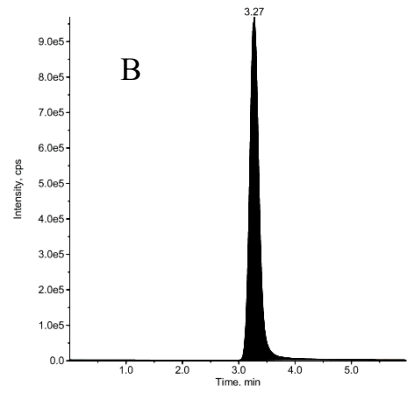

Choroid

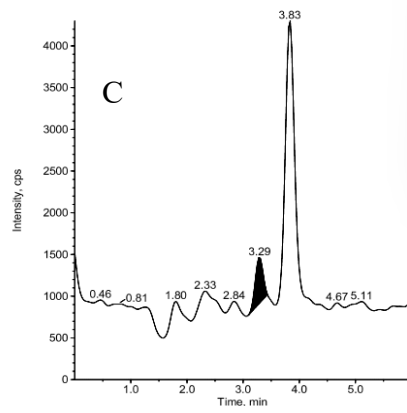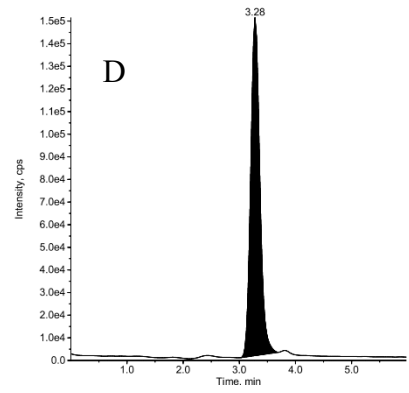

Sclera

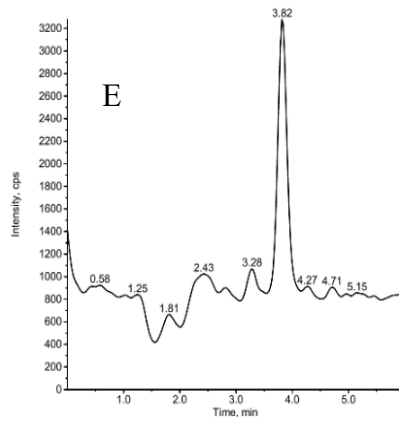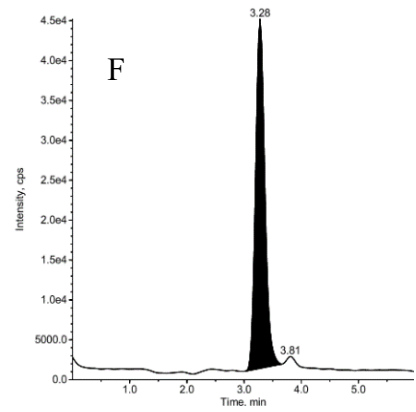

Standard

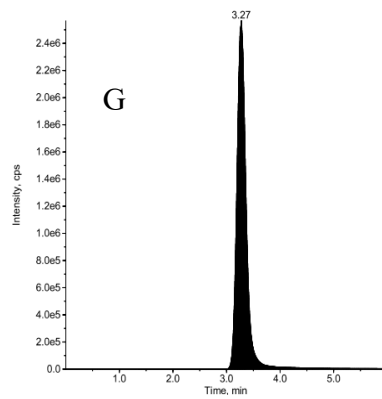



**Supplemental Figure 10 | Representative chromatogram of Phenylacetic Acid (PAA) in mouse ocular tissues after 4-Phenylbutyric Acid or PBS treatment.**

A to F are chromatograms corresponding to the results in Table 5. As an example, the retention time of the peak detected with the standard reagent (100,000 ng/g) of Phenylacetic Acid is shown in G. PAA was also determined by the internal standard method using 4-Phenylbutyric Acid-d<sub>11</sub> as the internal standard reagent in the same way as 4-Phenylbutyric Acid. In the case of detection by LC/MS/MS, monitor ions were set for 4-Phenylbutyric Acid, PAA, and 4-Phenylbutyric Acid-d<sub>11</sub>, respectively, and detection was performed from the chromatograms obtained. Monitor ion are shown in the methods in the text.

| gene    | Forward primer(5'→3')     | Reverse Primer(5'→3')    |
|---------|---------------------------|--------------------------|
| CHOP    | ATATCTCATCCCCAGGAAACG     | TCTTCCTTGCTCTTCCTCCTC    |
| ATF4    | CGAGATGAGCTTCCTG          | GGAAAAGGCATCCTCC         |
| GADD34  | GAGGGACGCCACAACTTC        | TTACCAGAGACAGGGGTAGGT    |
| SEL1L   | GGTGTGCCACAACCTATGACT     | TGGCTCTTCCTATTGCTTCCA    |
| EDEM    | GGGGCATGTTCTGCTTCGG       | CGGCAGTAGATGGGGTTGAG     |
| ERdj4   | CTCCACAGTCAGTTTTCTGCTT    | GGCCTTTTTGATTTGTCGCTC    |
| ERdj5   | GGAGCTGTCAACTGTGGTGAT     | CCGATCTCCATTGTACTTCACTG  |
| GRP78   | TGTGGTACCCACCAAGAAGTC     | TTCAGCTGTCACTCGGAGAAT    |
| GRP94   | CTCAGAAGAGCGCAGAAGACTCA   | AAAATTTCACATTCCTCTCCA    |
| ERdj3   | CCGGGACGCTTCCAATGA        | GGTACTCCATGCCATCTCGC     |
| Eif2ak3 | GACTGCGGAGACAACAGTGA      | GACCGGGTATAGGGAGAAGC     |
| Atf6    | AAGCAGCTCAACACGAGGAT      | CCTGTAGGAGAGGCATCAGC     |
| Col1a1  | GCTCCTCTTAGGGGCCACT       | CCACGCTCACCAATTGGGG      |
| Col1a2  | AAGGGTGTACTGGACTCCC       | TTGTTACCGGATTCCTCTTTGG   |
| Col2a1  | GGGAATGTCTCTGCGATGAC      | GAAGGGGATCTCGGGGTTG      |
| Col3a1  | CTGTAACTGGAACCTGGGGAAA    | CCATAGCTGAACCTGAAAACCACC |
| Col4a1  | CTGGCACAAAAGGGACGAG       | ACGTGGCCGAGAATTTACC      |
| Col4a2  | GACCGAGTGC GGTTCAAAG      | CGCAGGGCACATCCAATT       |
| Col4a3  | GGTGGGAAAAATGTGATCCTGG    | GCCTACGGATGGTTCTCCCT     |
| Col4a4  | ATGAGGTGCTTTTTCAGATGGAC   | GGGGCCGCCATACTTCTTG      |
| Col4a5  | TTCCAGGTTTGAAGGTCATCCA    | ACGTTCTCCCTTGGTTCCATT    |
| Col4a6  | ATCGGATACTCCTTCCCTCATGC   | CCAGGGGAGACTAGGGACTG     |
| Col5a1  | TGAGTCTGGTTTTCCCGAGGA     | GCCCTGCTCATTGTAATGGAGA   |
| Col5a2  | ACAGGTGAAGTGGGATTCTCA     | CCATAGCACCCATTGGACCA     |
| Col5a3  | CGGGGTACTCCTGGTCCTAC      | GCATCCCTACTTCCCCCTTG     |
| Col6a1  | CTGCTGCTACAAGCCTGCT       | CCCCATAAGGTTTCAGCCTCA    |
| Col6a2  | AAGGCCCATTTGGATTCCC       | CTCCCTTCCGACCATCCGAT     |
| Col6a3  | GCTGCGGAATCACTTTGTGC      | CACCTTGACACCTTTCTGGGT    |
| Col6a4  | CAGTACAGCGATACACCCACT     | AGTCCACGGATGTGTTCAAC     |
| Col6a5  | TGGGGCATCTAATGTTGGGG      | CTCCAAGCGCAGATCCAGTG     |
| Col7a1  | GCCCAGAGATAGAGTGACCTG     | CGCACTTCTCGAAAGTTGCTG    |
| Col8a1  | ACTCTGTCAAGCTCATTACGGC    | CAAAGGCATGTGAGGGACTTG    |
| Col8a2  | GCCCTGGATGAGACTGGTATC     | CGGTCAAACCTAACCGGCAT     |
| Col9a1  | CGACCCAGCCAGCACATCAA      | AGGGGGACCCCTAATGCCT      |
| Col9a2  | AAGGGGCCTCCAGGTAAGTT      | TCCCATAAACCATCAATGCCA    |
| Col9a3  | GGAAATGCCGGGTTCAAGG       | AGTCTCTTAATCCTCGTGGG     |
| Col10a1 | GGGACCCCAAGGACCTAAAG      | GCCCAACTAGACCTATCTCACCT  |
| Col11a1 | AGGTGGAACGAAACGGGTG       | GGAAGAGAAAAGTCAAGGCCGA   |
| Col11a2 | GAAGGGTGCTCGTGGGAAA       | GAGGGCCTGGGTATCCTAGAG    |
| Col12a1 | AAGTTGACCCACCTTCCGAC      | GGTCCACTGTTATTCTGTAACCC  |
| Col13a1 | GGAGCACCTGGACTAGACG       | GCCTTGACTGGTAAGCCAT      |
| Col14a1 | TTTGGCGGCTGCTTGTTC        | CGCTTTTGTTCAGTGTTCCTG    |
| Col15a1 | GCCAGCGGGTTATCCTCTAC      | ATCACGGGCACGGAGAAAAC     |
| Col16a1 | GAGAGCGAGGATACACTGGC      | CTGGCCTGAAATCCCTGG       |
| Col17a1 | AAGTCACCGAGAGAATGTCCAC    | AGAGAGCCGTCTTAGCATATCC   |
| Col18a1 | GTGCCATCGTCAACCTGAA       | GACATCTCTGCCGTCAAAGAA    |
| Col19a1 | GGCTCTTGGAAATTGTGGACC     | ACTTCCCAACTTGAAACAGGTT   |
| Col20a1 | AGCCGACTCATTGCCAAAAA      | GGGTGGGTATAAGGCTGGAG     |
| Col22a1 | GGGGAACCTGGATACGCTAAA     | CAAAGTACGCACACTGGGAG     |
| Col23a1 | CCCCATCTGAGTGATCTGTC      | CTTGCCGTCCAGACCTAGAG     |
| Col24a1 | TTCCTGTCTAACACCCCAAGG     | CCATCCTGAATCTTGCACTCAT   |
| Col25a1 | GGGGTCAAAGGGTGATCGTG      | CCGTGACAGTTAAGGTGGTAA    |
| Col26a1 | AGAGGGGAGTTTGGGACTGT      | GGACCAGTAGGCTCAGCAAG     |
| Col27a1 | CCTTCCCGTAGGGACTCCAT      | GGCACAGTAATTGTGAGCGAC    |
| Col28a1 | ACCCGTTCTACTATTGAGTGACC   | GCTCGCCCTTTTCACATTCA     |
| Muc1    | TCTCCAGCCACCAGCCCTCTAA    | TGGCCATGGTAGGAGAAACAGG   |
| Muc4    | CTCCAAGAAATGTAGTGGGCTTCA  | CACGGTCTTGGGCTGGAGTA     |
| Muc5ac  | AAAGACACCAGTAGTCACTCAGCAA | CTGGGAAGTCAGTGTCAAACCA   |
| β-actin | GGAGGAAGAGGATGCGGCA       | GAAGCTGTGCTATGTTGCTCTA   |
| Hprt    | TCAGTCAACGGGGACATAAA      | GGGGCTGACTGCTTAACCCAG    |

Supplemental Table 1 | List of Primers (mouse) used in present study.

| gene                 | Forward primer(5'→3') | Reverse Primer(5'→3')  |
|----------------------|-----------------------|------------------------|
| chick CHOP           | AGCTGAGTGCACACAACGAG  | GCTGTACAGTGGTGCTGGAA   |
| chick GRP78          | CCTGGAATGACCCCTCTGTA  | CTTGCCCAGATAAGCCTCTG   |
| chick $\beta$ -actin | GCGCTCGTTGTTGACAAT    | CATCACCAACGTAGCTGTCTTT |

Supplemental Table 2 | List of Primers (chick) used in present study.

| gene                 | Forward primer(5'→3')  | Reverse Primer(5'→3')  |
|----------------------|------------------------|------------------------|
| human Col1a1         | GAGGGCCAAGACGAAGACATC  | CAGATCACGTCATCGCACAAAC |
| human Col4a2         | AAGGGCTTCATCGGAGACC    | CCAGCGTCACCTTTCCACC    |
| human Col4a3         | GCAGTGGTTCTAAGGGTGAGC  | GAAAGCCAAAGAATCCCGGAG  |
| human Col6a1         | ACAGTGACGAGGTGGAGATCA  | GATAGCGCAGTCGGTGTAGG   |
| human Col6a2         | GACTCCACCGAGATCGACCA   | CTTGTAGCACTCTCCGTAGGC  |
| human Col7a1         | TTACGCCGCTGACATTGTGTT  | ACCAGCCCTTCGAGAAAGC    |
| human Col8a1         | GGGAGTGCTGCTTACCATTTC  | AGCGGCTTGATCCCATAGTAG  |
| human Col8a2         | GCTGGCTTAGGCAAACCTG    | GGACTCCCACACCGTCTACT   |
| human Col11a2        | GCTCCCCTCCTGACTCTCTAC  | CCGGGTGACTCGCTTCTTG    |
| human Col12a1        | AGCTGAGGCAGACATTGTGTT  | CCTCCTTTGTACGGCAAGTTT  |
| human Col15a1        | CTGCCCTCGTCCGTATCCT    | CTGATGGCGAAGTCCCTGA    |
| human Col18a1        | CAGTGGACACACTTAGCCCTC  | GCGGCATTCTCTGGAECTCC   |
| human $\beta$ -actin | CACCATTGGCAATGAGCGGTTT | AGGTCTTTGCGGATGTCCACGT |

Supplemental Table 3 | List of Primers (human) used in present study.

| Treatment            | Sample  | Concentration of 4-Phenylbutyric Acid (ng/g) |     |     |      |     |
|----------------------|---------|----------------------------------------------|-----|-----|------|-----|
|                      |         | 1                                            | 2   | 3   | Mean | SD  |
| 4-Phenylbutyric Acid | Retina  | 209                                          | 221 | 165 | 198  | 29  |
|                      | Choroid | 327                                          | 520 | 208 | 352  | 157 |
|                      | Sclera  | 829                                          | 691 | 117 | 546  | 378 |
| PBS                  | Retina  | BLQ                                          | BLQ | BLQ | BLQ  | NC  |
|                      | Choroid | BLQ                                          | BLQ | BLQ | BLQ  | NC  |
|                      | Sclera  | BLQ                                          | BLQ | BLQ | BLQ  | NC  |

BLQ : Below the lower limit of quantification

Supplemental Table 4 | Concentrations of 4-PBA in mouse ocular tissues after 4-PBA treatment.

| Treatment            | Sample  | Concentration of Phenylacetic Acid (ng/g) |       |       |       |      |
|----------------------|---------|-------------------------------------------|-------|-------|-------|------|
|                      |         | 1                                         | 2     | 3     | Mean  | SD   |
| 4-Phenylbutyric Acid | Retina  | 34100                                     | 33900 | 30900 | 33000 | 1800 |
|                      | Choroid | 7780                                      | 5120  | 6040  | 6310  | 1350 |
|                      | Sclera  | 1610                                      | 1480  | 1500  | 1530  | 70   |
| PBS                  | Retina  | BLQ                                       | BLQ   | BLQ   | BLQ   | NC   |
|                      | Choroid | BLQ                                       | BLQ   | BLQ   | BLQ   | NC   |
|                      | Sclera  | BLQ                                       | BLQ   | BLQ   | BLQ   | NC   |

BLQ : Below the lower limit of quantification

NC: Not calculated

Supplemental Table 5 | Concentrations of Phenylacetic acid in mouse ocular tissues after 4-PBA treatment.

| Treatment            | Sample |        | Concentration of 4-Phenylbutyric Acid (ng/g or ng/mL) |         |        |        |
|----------------------|--------|--------|-------------------------------------------------------|---------|--------|--------|
|                      |        |        | Retina (right)                                        | Choroid | Sclera | Plasma |
| 4-Phenylbutyric Acid | 1      | -      | BLQ                                                   | BLQ     | BLQ    | BLQ    |
|                      | 2      | 15 min | 349                                                   | 348     | 203    | 394    |
|                      | 3      | 30 min | 88.2                                                  | 117     | 107    | 186    |
|                      | 4      | 60 min | 27.9                                                  | 76.7    | 44.9   | 76.2   |

BLQ : Below the lower limit of quantification

Supplemental Table 6 | Concentrations of 4-PBA in mouse ocular tissues and plasma after 4-PBA ocular administration.

| Treatment            | Sample |        | Concentration of Phenylacetic Acid (ng/g or ng/mL) |         |        |        |
|----------------------|--------|--------|----------------------------------------------------|---------|--------|--------|
|                      |        |        | Retina (right)                                     | Choroid | Sclera | Plasma |
| 4-Phenylbutyric Acid | 1      | -      | 15.4                                               | 16.1    | 22.0   | 61.4   |
|                      | 2      | 15 min | 51.1                                               | 66.7    | 96.3   | 87.5   |
|                      | 3      | 30 min | 50.2                                               | 49.2    | 38.8   | 69.8   |
|                      | 4      | 60 min | 21.6                                               | 29.5    | 48.3   | 38.3   |

BLQ : Below the lower limit of quantification

Supplemental Table 7 | Concentrations of Phenylacetic Acid in mouse ocular tissues and plasma after 4-PBA ocular administration.



| Agonists/Antagonists      | Abbreviations in this paper | Action and mechanism                                                                                                                |
|---------------------------|-----------------------------|-------------------------------------------------------------------------------------------------------------------------------------|
| 4-phenylbutyric Acid      | 4-PBA                       | Acts as a chemical chaperone to aid in protein folding and consequently reduce ER stress                                            |
| Tauroursodeoxycholic Acid | TUDCA                       | Chemical chaperone which can inhibit unfolded protein response dysfunction and ameliorate ER stress                                 |
| Tunicamycin               | Tm                          | Inhibits glycoprotein biosynthesis in the ER which results in accumulation of misfolded protein, followed by induction of ER stress |
| Thapsigargin              | TG                          | Inhibits sarco/endoplasmic reticulum Ca <sup>2+</sup> -ATPase which causes ER stress                                                |
| STF083010                 | STF or S                    | IRE1 inhibitor through blocking IRE1 endonuclease activity                                                                          |
| 4 $\mu$ 8C                | 4 $\mu$ 8C or 4             | IRE1 inhibitor through blocking substrate access to the active site of IRE1                                                         |
| GSK2656157                | GSK or G                    | PERK inhibitor through competing with ATP                                                                                           |
| GSK2606414                | GSK2606414 or G2            | The first PERK inhibitors                                                                                                           |
| Nerfinavir                | NFV or N                    | ATF6 inhibitor through blocking Site-2 proteinase cleavage of ATF6                                                                  |
| Ceapin-7                  | Ceapin or CP                | ATF6 inhibitor through preventing transport of ATF6a to the Golgi apparatus                                                         |
| CCT020312                 | CCT                         | A selective PERK activator which elicits eIF2 phosphorylation                                                                       |
| AA147                     | AA                          | A selective ATF6 activator                                                                                                          |

Supplemental Table 8 | Compounds for intervention in ER stress used in this study.
